# Supplementary material for: Trace Elements in Portuguese Children: Urinary Levels and Exposure Predictors
Source: MDPI journal article supplement (doi:10.3390/toxics11090767), 2023-09-09
Supplement: s1 [file s1]

## Supplementary Material

# Trace Elements in Portuguese Children: Urinary Levels and Exposure Predictors

Luísa Correia-Sá <sup>1,\*</sup>, Virgínia C. Fernandes <sup>1,2</sup>, Maria Luz Maia <sup>1,2</sup>, Edgar Pinto <sup>3,4</sup>, Sónia Norberto <sup>2</sup>, Agostinho Almeida <sup>3</sup>, Cristina Santos <sup>2,5</sup>, Cristina Delerue-Matos <sup>1</sup>, Conceição Calhau <sup>2,6</sup> and Valentina F. Domingues <sup>1,\*</sup>

1        REQUIMTE/LAQV, Instituto Superior de Engenharia do Porto, Instituto Politécnico do Porto, Rua Dr. António Bernardino de Almeida 431, 4249-015 Porto, Portugal; virginiacruz@graq.isep.ipp.pt (V.C.F.); mariadaluz.maia@gmail.com (M.L.M.); cmm@isep.ipp.pt (C.D.-M.)

2        Center for Research in Health Technologies and Information Systems, 4200-450 Porto, Portugal; sonia.norberto.nutri@gmail.com (S.N.); csantos.cristina@gmail.com (C.S.); ccalhau@nms.unl.pt (C.C.)

3        REQUIMTE/LAQV, Departamento de Ciências Químicas, Faculdade de Farmácia, Universidade do Porto, 4249-015 Porto, Portugal; ecp@ess.ipp.pt (E.P.); aalmeida@ff.up.pt (A.A.)

4        Department of Environmental Health, School of Health, P.Porto, R. Dr. António Bernardino de Almeida 400, 4200-072 Porto, Portugal

5        Health Information and Decision Science, Faculty of Medicine, University of Porto, 4200-319 Porto, Portugal

6        Nutrição e Metabolismo NOVA Medical School, Faculdade de Ciências Médicas, Universidade Nova de Lisboa, 1169-056 Lisboa, Portugal

\*        Correspondence: mariacs31@gmail.com (L.C.-S.); vfd@isep.ipp.pt (V.F.D.)

Keywords: elements; biomonitoring; children; obesity; predictors; urinary levels

**Table S1-** Median concentrations of trace elements (µg/g creatinine) according to diet group, region, gender, and age.

| Element   | Diet group          |             |                     |             |                  | Region       |             |                |              |                  | Gender        |       |             |       |         | Age          |              |             |              |                  |
|-----------|---------------------|-------------|---------------------|-------------|------------------|--------------|-------------|----------------|--------------|------------------|---------------|-------|-------------|-------|---------|--------------|--------------|-------------|--------------|------------------|
|           | Healthy diet (n=67) |             | Regular diet (n=43) |             | p-value          | Porto (n=79) |             | Aveiro (n= 31) |              | p-value          | Female (n=55) |       | Male (n=55) |       | p-value | 4-11 years   |              | 12-18 years |              | p-value          |
|           | Median              | Max.        | Median              | Max.        |                  | Median       | Max.        | Median         | Max.         |                  | Median        | Max.  | Median      | Max.  |         | Median       | Max.         | Median      | Max.         |                  |
| <b>Cu</b> | <b>27.2</b>         | <b>94.4</b> | <b>14.7</b>         | <b>74.2</b> | <b>&lt;0.001</b> | <b>26.2</b>  | <b>94.4</b> | <b>12.</b>     | <b>35.32</b> | <b>&lt;0.001</b> | 22.1          | 94.4  | 21.7        | 62.2  | 0.388   | <b>26.7</b>  | <b>94.4</b>  | <b>13.0</b> | <b>74.2</b>  | <b>&lt;0.001</b> |
| <b>Co</b> | 0.74                | 1.62        | 0.88                | 2.86        | 0.147            | <b>0.66</b>  | <b>2.15</b> | <b>0.90</b>    | <b>2.86</b>  | <b>0.002</b>     | 0.83          | 2.86  | 0.74        | 1.90  | 0.233   | 0.84         | 1.89         | 0.65        | 2.86         | 0.214            |
| <b>I</b>  | 118.6               | 536.9       | 131.9               | 355.6       | 0.126            | 122.5        | 536.9       | 131.9          | 310.3        | 0.311            | 118.6         | 435.2 | 128.7       | 536.9 | 0.832   | <b>152.4</b> | <b>536.9</b> | <b>62.2</b> | <b>355.6</b> | <b>&lt;0.001</b> |
| <b>Mo</b> | 55.9                | 149.8       | 51.4                | 130.4       | 0.431            | 55.0         | 149.8       | 51.4           | 117.6        | 0.534            | 55.           | 149.8 | 51.7        | 130.4 | 0.950   | <b>63.1</b>  | <b>149.8</b> | <b>44.1</b> | <b>110.4</b> | <b>&lt;0.001</b> |
| <b>Mn</b> | <b>2.89</b>         | <b>27.9</b> | <b>1.44</b>         | <b>8.75</b> | <b>&lt;0.001</b> | <b>2.50</b>  | <b>14.0</b> | <b>1.05</b>    | <b>27.9</b>  | <b>&lt;0.001</b> | 2.32          | 11.5  | 1.92        | 27.9  | 0.213   | <b>2.91</b>  | <b>27.9</b>  | <b>1.19</b> | <b>8.75</b>  | <b>&lt;0.001</b> |
| <b>Ni</b> | 4.83                | 15.4        | 4.65                | 24.8        | 0.238            | 4.65         | 17.0        | 4.78           | 24.8         | 0.401            | 5.14          | 24.8  | 4.47        | 13.8  | 0.174   | <b>5.47</b>  | <b>24.8</b>  | <b>3.48</b> | <b>17.0</b>  | <b>&lt;0.001</b> |
| <b>As</b> | 31.8                | 214.6       | 48.7                | 453.6       | 0.175            | 40.3         | 453.6       | 29.7           | 166.1        | 0.246            | 36.5          | 453.6 | 39.3        | 236.6 | 0.988   | 39.9         | 214.6        | 32.3        | 453.6        | 0.219            |
| <b>Sb</b> | <b>0.10</b>         | <b>0.32</b> | <b>0.06</b>         | 0.31        | <b>0.003</b>     | <b>0.10</b>  | <b>0.32</b> | <b>0.06</b>    | <b>0.31</b>  | <b>&lt;0.001</b> | 0.09          | 0.32  | 0.08        | 0.31  | 0.435   | <b>0.11</b>  | <b>0.32</b>  | <b>0.05</b> | <b>0.31</b>  | <b>&lt;0.001</b> |
| <b>Cd</b> | 0.29                | 0.72        | 0.29                | 0.64        | 0.963            | 0.29         | 0.59        | 0.25           | 0.72         | 0.727            | 0.29          | 0.58  | 0.29        | 0.72  | 0.790   | <b>0.32</b>  | <b>0.72</b>  | <b>0.23</b> | <b>0.47</b>  | <b>&lt;0.001</b> |
| <b>Pb</b> | <b>1.21</b>         | <b>19.9</b> | <b>0.82</b>         | <b>10.2</b> | <b>0.050</b>     | <b>1.10</b>  | <b>19.9</b> | <b>0.79</b>    | <b>7.87</b>  | <b>0.044</b>     | 0.99          | 19.88 | 0.88        | 6.61  | 0.368   | <b>1.24</b>  | <b>19.9</b>  | <b>0.62</b> | <b>10.1</b>  | <b>&lt;0.001</b> |
| <b>Sn</b> | <b>0.39</b>         | <b>30.1</b> | <b>0.49</b>         | 11.8        | <b>0.038</b>     | 0.45         | 30.06       | 0.46           | 11.8         | 0.659            | 0.49          | 11.80 | 0.40        | 30.06 | 0.233   | <b>0.49</b>  | <b>30.1</b>  | <b>0.25</b> | <b>11.8</b>  | <b>0.003</b>     |
| <b>Tl</b> | 0.42                | 2.68        | 0.36                | 2.49        | 0.357            | <b>0.46</b>  | <b>2.68</b> | <b>0.22</b>    | <b>0.99</b>  | <b>&lt;0.001</b> | 0.41          | 2.68  | 0.37        | 1.57  | 0.404   | <b>0.48</b>  | <b>2.68</b>  | <b>0.26</b> | <b>1.12</b>  | <b>&lt;0.001</b> |

Mann-Whitney-U test, 2 tailed; significant differences between groups ( $p \leq 0.05$ ) are marked in bold. Healthy diet – obese/overweight children on healthy diet; Regular diet – normal/underweight children following their regular diet; Max. - Maximum
